# Supplementary material for: Experimental validation of ‘pnicogen bonding’ in nitrogen by charge density analysis
Source: Royal Society of Chemistry journal article supplement (doi:10.1039/c4cp04690k), 2014-12-01
Supplement: c4cp04690k1.pdf [file c4cp04690k1.pdf]

## **Supporting Information**

### **Experimental validation of ‘Pnicogen Bonding’ in Nitrogen from charge density analysis**

Sounak Sarkar, Mysore S. Pavan and T. N. Guru Row\*

Solid state and Structural Chemistry Unit,

Indian Institute of Science, Bangalore 560012, India

**S-1:** Experimental section including data collection, structure refinement, multipole modeling and computational details

**F-1:** ORTEP diagram of the molecule

**T-1:** Crystallographic table of the experimental structure

**F-2:** (a) Variation of  $F_{obs}/F_{cal}$  with  $(\sin\theta)/\lambda$  (b) Scatter plot depicting the variation of  $F_{obs}$  with  $F_{cal}$  for (**I**)

**T-2:** Topological parameters of intramolecular bonds from Experiment

**T-3:** Topological parameters of intramolecular bonds from Theory

**S-2:** CSD Analysis

**T-4:** Summary of CSD Analysis

**F-3:** Histograms depicting various  $N\cdots X$  distance distribution along with corresponding scatter plots showing the  $N\cdots X$  distance vs.  $X-N\cdots X$  angle.

**F-4:** Histogram depicting the  $N-H\cdots X$  angle distribution of the possible bifurcated H-bonding in (**I**)

**T-5:** Structures found in the CSD analysis having biological relevance

**F-5:** Fractal dimension plot of experimental and theoretical model (a) & (b) (**I**)

**F-5:** Probability distribution plot of experimental model

**F-6:** Experimental and Theoretical residual density, Laplacian and 2D deformation maps.

**F-7:** Comparison between experiment and theory AIM charges

**F-8:** Theoretical bond paths together with bcp's in the intermolecular regions of (**I**)

## S-1: Experimental Section

Crystallization: 2-Amino-5-nitropyridine and chloroacetic acid were taken in 1:1 molar ratios in mortar pastel and ground well with addition of few drops of methanol. The resulting solid was kept for crystallization in saturated solution of methanol at low temperature. Good quality single crystals were chosen using a polarizing microscope and affixed to a Hampton Research Cryoloop using Paratone-N oil.

### Data collection and structure refinement details

A crystal of dimensions  $0.4 \times 0.2 \times 0.1$  mm, was cooled to 100 K with a liquid nitrogen stream using an Oxford Cryostream nitrogen gas-stream cooling device. X-ray diffraction data was collected on an Oxford Xcalibur (Mova) diffractometer<sup>1</sup> equipped with an EOS CCD detector using *MoK $\alpha$*  radiation ( $\lambda = 0.71073$  Å). The crystal to detector distance was fixed at 45 mm and the scan width ( $\Delta\omega$ ) was  $1^\circ$  per frame during the data collection. The data collection strategy was chosen in such a way to yield a high resolution X-ray data set ( $d = 0.45$  Å), with a high redundancy ( $\sim 12$ ) and completeness of 100%. Cell refinement, data integration and reduction were carried out using the program CrysAlisPro.<sup>1</sup> Face indexing was done to facilitate accurate numerical absorption correction. Sorting, scaling, and merging of the data sets were carried out using the program SORTAV.<sup>2</sup> The crystal structure was solved by direct method using SHELXS97 and refined based on the spherical-atom approximation (based on F2) using SHELXL97<sup>3</sup> included in the WinGX package suite.<sup>4</sup> The hydrogen atom was located on the difference Fourier map and its position and isotropic thermal parameters were allowed to refine in the spherical atom model.

### Multipole Modeling

The charge density modeling and multipolar aspherical atom refinements were performed based on the Hansen and Coppens multipole formalism using XD2006.<sup>5</sup> The function,  $\Sigma w^2$  was minimized for all reflections with  $I > 2\sigma(I)$ . Weights ( $w$ ) were taken as  $1/\sigma^2(F_o^2)$  and convergence criterion of the refinement was set to a maximal shift/esd  $< 10^{-10}$ . Su-Coppens-Macchi wave functions<sup>6</sup> were used for the core and valence scattering factors of all the atoms. Scale factors for each individual resolution shell were chosen (10 scale factors) and refined against the entire resolution range of diffraction data in the first refinement step. The scatter plot of the variation of  $F_{obs}$  with  $F_{cal}$  is indicative of the quality of the data set after scaling. The positional and anisotropic displacement parameters of the non-hydrogen atoms were refined using reflection data with  $\sin \theta/\lambda > 0.7$  Å<sup>-1</sup>. Since the space group of (**I**) was *Cc*, the origin was fixed on the Chlorine atom. In the next step of refinement, the position and displacement parameters of the non-hydrogen atoms were fixed to the refined values. The X—H bond lengths were constrained to the values reported by neutron diffraction experiments in literature.<sup>7</sup> The isotropic displacement parameters of the H-atom was refined initially with reflection data  $\sin \theta/\lambda < 0.7$  Å<sup>-1</sup>. Further, the converged model was used to calculate anisotropic displacement parameters of H-atom using the SHADE2.1 server.<sup>8</sup> ADP value of the H-atom obtained from SHADE2.1 server was kept fixed during the subsequent multipole refinements.<sup>9</sup> Then the scale, positional and anisotropic displacement parameters,  $P_{val}$ ,  $P_{lm}$ , and on non-hydrogen atoms were refined in a stepwise manner, until the convergence criterion was reached. Separate  $\kappa$  and  $\kappa'$  were used to define different non-H atom type based chemical environments, while for the

hydrogen atoms the value was fixed at 1.2. All the atoms in (**I**) were refined with an unrestricted multipole model. The multipole expansion was truncated upto hexadecapole level ( $l = 4$ ) for only chlorine in (**I**), where as for other non-hydrogen atoms it was truncated at the octupole level ( $l = 3$ ) in both cases. For the H atoms, only monopole, bond directed dipole (dz) and quadrupole ( $q_{3z^2-1}$ ) components were refined during the multipole refinements. The multipole refinement was done keeping anisotropic harmonic model. The quantitative analysis of the electron density topology and related properties was performed using the XDPROP and TOPXD<sup>10</sup> module of XD software suite.<sup>5</sup> Crystallographic refinement details of both spherical and multipolar model are summarized in Table 1.

## Computational details

### Theoretical Charge Density

Positional parameters obtained from the experimental charge density model have been used for density functional calculations using the hybrid exchange correlational functional B3LYP<sup>11</sup> with TZVP basis set<sup>12</sup> included in CRYSTAL09 package.<sup>13</sup> The shrinking factors (IS1, IS2, and IS3) and the reciprocal lattice vectors were set to 3 (with 10 k-points in irreducible Brillouin zone). The bielectronic Coulomb and exchange series values for the truncation parameter were set as ITOL1\_ITOL4 = 6 and ITOL5 = 12, respectively, for the calculations. The level shifter was set to 0.3 Hartree/cycle as 30% mixing of Fock/KS matrices (FMIXING) given in the input. An SCF convergence limit of the order of  $10^{-6}$  Hartree was used. In the static model, atomic thermal displacement parameters for all atoms were set to zero.

Structure factors were calculated for a resolution of  $1.08\text{\AA}^{-1}$ , which were used for the theoretical multipolar model. Refinements and analysis for the theoretical charge density model were performed using the XD software package following the same methodology used for the experimental charge density modeling.

### NBO Calculation

The Natural Bond Orbital (NBO) method<sup>14</sup> has been used to analyze the 'pnictogen bonding' in (**I**). The analysis of the off-diagonal elements of the Fock matrix by second-order perturbation theory shows two interactions between two monomeric units (Clacac and 2-A5NP) as there is a stabilizing charge transfer from the three lone pair orbitals of Cl (LP (1)), LP (2)) and (LP (3)) atom in donor Chloroacetic acid (Clacac) into the anti-bonding  $\sigma^*$  orbital of N-C bond (BD\* (1) N-C) of acceptor of 2-Amino-5-Nitropyridine(2-A5NP). The NBO calculations are carried out on (**I**) and also on Clacac and 2-A5NP separately as implemented in Gaussian09<sup>15</sup> at wB97XD<sup>16</sup> with a basis set of TZVP.<sup>17</sup> The inputs for the single point calculations are derived from the multipole model of (**I**). The outputs from the NBO calculation are viewed using Chemcraft 1.7.<sup>18</sup>

**Table 2** in the manuscript lists the details of the outcome from the NBO analysis. The conclusions can be made (**Table 2**) on the account of orbital energy and orbital occupancy changes of the participating orbitals in  $N\cdots Cl$  pnictogen bonding interaction. For instance in (**I**) the energies of all the lone pair natural bond orbitals (LP (1)), LP (2)) and (LP (3)) decreases with respect to their values in the monomer (Clacac), as the orbitals are becoming stabilized with a subsequent decrease in their occupancies. Contrariwise is encountered for acceptor  $\sigma^*C-N$  antibonding orbital in terms of orbital energy and orbital occupancy with respect to its monomeric counterpart.

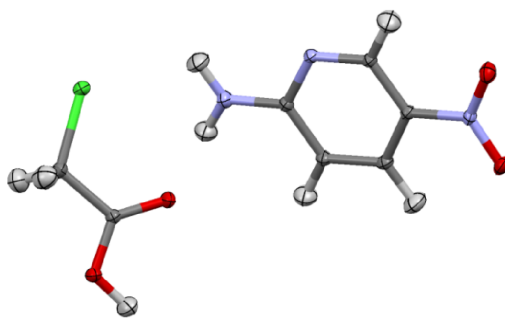

**Figure 1:** Ortep diagram of co-crystal of 2-amino-5-nitropyridine and chloroacetic acid. (I)

**Table 1:** Crystallographic table of the experimental structure

|                                                                                                                |                                     |
|----------------------------------------------------------------------------------------------------------------|-------------------------------------|
| Compound                                                                                                       | (I)                                 |
| CCDC                                                                                                           | 1019123                             |
| Chemical formula                                                                                               | $C_5H_5N_3O_2 \cdot C_2H_3ClO_2$    |
| <i>Molecular formula</i>                                                                                       | 233.61                              |
| Crystal system, space group                                                                                    | Monoclinic, <i>Cc</i>               |
| Temperature (K)                                                                                                | 100(2)                              |
| <i>a</i> , <i>b</i> , <i>c</i> (Å)                                                                             | 4.8198 (1), 21.7824 (3), 9.3616 (2) |
| $\beta$ (°)                                                                                                    | 104.264 (2)                         |
| <i>V</i> (Å <sup>3</sup> )                                                                                     | 952.54 (3)                          |
| <i>Z</i>                                                                                                       | 4                                   |
| $\rho_{calc}$ (g/cm <sup>3</sup> )                                                                             | 1.628                               |
| <i>T</i> (K)                                                                                                   | 100(2)                              |
| <i>F</i> (000)                                                                                                 | 480                                 |
| $\lambda$ (Å)                                                                                                  | 0.71073                             |
| (sin $\theta/\lambda$ ) <sub>max</sub> (Å <sup>-1</sup> )                                                      | 1.080                               |
| Radiation type                                                                                                 | Mo <i>K</i> α                       |
| $\mu$ (mm <sup>-1</sup> )                                                                                      | 0.40                                |
| Crystal size (mm)                                                                                              | 0.42 × 0.18 × 0.11                  |
| <b>Data collection</b>                                                                                         |                                     |
| Absorption correction                                                                                          | Gaussian                            |
| <i>T</i> <sub>min</sub> , <i>T</i> <sub>max</sub>                                                              | 0.883, 1.678                        |
| Measured, independent and observed [ <i>I</i> > 2σ( <i>I</i> )] reflections                                    | 52653, 9688, 8542                   |
| <i>R</i> <sub>int</sub> (%)                                                                                    | 4.4                                 |
| (sin $\theta/\lambda$ ) <sub>max</sub> (Å <sup>-1</sup> )                                                      | 1.080                               |
| <b>Spherical Refinement</b>                                                                                    |                                     |
| <i>R</i> [ <i>F</i> <sup>2</sup> > 2σ( <i>F</i> <sup>2</sup> )], <i>wR</i> ( <i>F</i> <sup>2</sup> ), <i>S</i> | 0.033, 0.078, 1.05                  |
| No. of unique reflections                                                                                      | 9688                                |
| Completeness (%)                                                                                               | 96.3                                |
| Redundancy                                                                                                     | 5.4                                 |
| No. of restraints                                                                                              | 10                                  |
| $\Delta\rho_{max}$ , $\Delta\rho_{min}$ (e Å <sup>-3</sup> )                                                   | 0.64, -0.25                         |
| Absolute structure parameter                                                                                   | 0.03 (2)                            |
| <b>Multipole Refinement</b>                                                                                    |                                     |
| Reflns.used[ <i>I</i> > 2σ( <i>I</i> )]                                                                        | 8542                                |
| No of parameters                                                                                               | 446                                 |
| <i>R</i> ( <i>F</i> <sup>2</sup> )                                                                             | 0.0327                              |
| <i>wR</i> <sub>2</sub> ( <i>F</i> <sup>2</sup> )                                                               | 0.0446                              |
| Goodness-of-fit                                                                                                | 0.9060                              |
| $\Delta\rho_{min,max}$ (eÅ <sup>-3</sup> )                                                                     | -0.233,0.215                        |

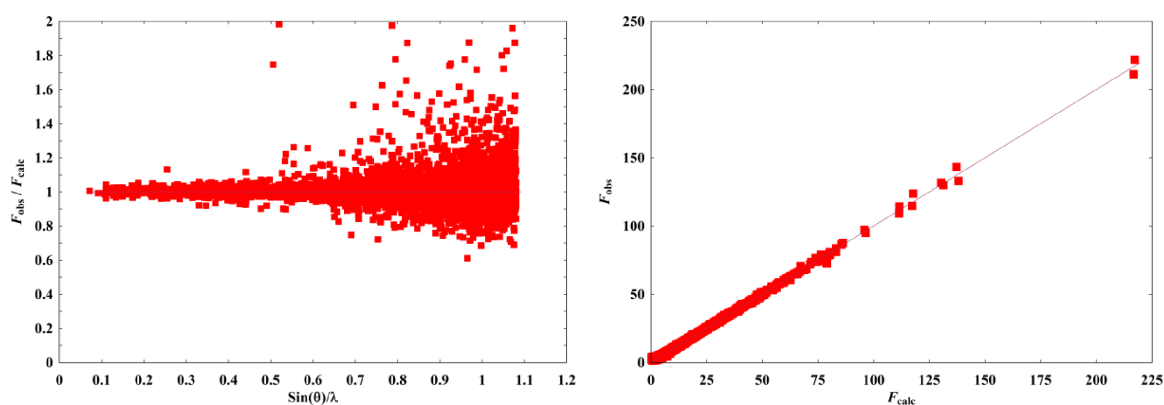

**Figure 2:** (a) Variation of  $F_{obs}/F_{calc}$  with  $(\sin\theta)/\lambda$  (b) Scatter plot depicting the variation of  $F_{obs}$  with  $F_{calc}$  for (I)

**Table 2:** Topological parameters of intramolecular bonds from Experiment

| Bond       | $\rho$ (eÅ <sup>-3</sup> ) | $\nabla^2\rho$ (eÅ <sup>-5</sup> ) | $R_{ij}$ (Å) | $\lambda_1$ | $\lambda_2$ | $\lambda_3$ | $\epsilon$ |
|------------|----------------------------|------------------------------------|--------------|-------------|-------------|-------------|------------|
| CL(1)-C(1) | 1.17(3)                    | 0.17(5)                            | 1.7786       | -6.46       | -5.75       | 12.38       | 0.12       |
| O(1)-C(2)  | 2.62(4)                    | -36.0(2)                           | 1.2953       | -24.35      | -22.52      | 10.91       | 0.08       |
| O(1)-H(1O) | 1.54(9)                    | -29.4(8)                           | 1.018        | -29.14      | -28.86      | 28.63       | 0.01       |
| O(2)-C(2)  | 3.01(5)                    | -43.7(3)                           | 1.2303       | -32.43      | -27.19      | 15.93       | 0.19       |
| O(3)-N(1)  | 3.33(4)                    | -7.1 (1)                           | 1.2316       | -30.88      | -29.00      | 52.73       | 0.07       |
| O(4)-N(1)  | 3.26(4)                    | -6.3(1)                            | 1.2311       | -30.81      | -27.71      | 52.17       | 0.11       |
| N(1)-C(6)  | 1.94 (4)                   | -13.1(1)                           | 1.4436       | -15.59      | -11.99      | 14.51       | 0.3        |
| N(2)-C(3)  | 2.46(5)                    | -25.9(2)                           | 1.3322       | -21.87      | -17.86      | 13.79       | 0.22       |
| N(2)-H(2A) | 2.23(1)                    | -30.0(6)                           | 1.011        | -31.26      | -29.15      | 30.46       | 0.07       |
| N(2)-H(2B) | 2.1(1)                     | -27.8 (7)                          | 1.0115       | -29.30      | -28.06      | 29.55       | 0.04       |
| N(3)-C(3)  | 2.34(4)                    | -21.2(1)                           | 1.3575       | -20.00      | -16.73      | 15.55       | 0.2        |
| N(3)-C(7)  | 2.33(4)                    | -21.0(1)                           | 1.3405       | -18.86      | -17.27      | 15.11       | 0.09       |
| C(1)-C(2)  | 1.73(3)                    | -12.36(7)                          | 1.519        | -12.86      | -10.97      | 11.47       | 0.17       |
| C(1)-H(1A) | 1.77(9)                    | -15.2 (4)                          | 1.0913       | -16.53      | -15.87      | 17.2        | 0.04       |
| C(1)-H(1B) | 1.86 (8)                   | -19.1(4)                           | 1.0912       | -17.90      | -17.14      | 15.94       | 0.04       |
| C(3)-C(4)  | 2.06(3)                    | -17.09(9)                          | 1.424        | -16.07      | -13.10      | 12.08       | 0.23       |
| C(4)-C(5)  | 2.21(4)                    | -18.9(1)                           | 1.3711       | -17.40      | -13.58      | 12.06       | 0.28       |
| C(4)-H(4)  | 1.92 (9)                   | -20.3(4)                           | 1.0838       | -18.36      | -17.31      | 15.4        | 0.06       |
| C(5)-C(6)  | 2.15(4)                    | -18.02(9)                          | 1.4042       | -16.95      | -13.38      | 12.32       | 0.27       |
| C(5)-H(5)  | 1.74(9)                    | -14.2(4)                           | 1.0823       | -16.6       | -15.99      | 18.37       | 0.04       |
| C(6)-C(7)  | 2.19(4)                    | -20.49(9)                          | 1.3782       | -17.62      | -14.23      | 11.36       | 0.24       |
| C(7)-H(7)  | 1.97(9)                    | -19.5(4)                           | 1.0829       | -19.33      | -17.80      | 17.68       | 0.09       |

**Table 3:** Topological parameters of intramolecular bonds from Theory

| Bond       | $\rho$ (eÅ <sup>-3</sup> ) | $\nabla^2\rho$ (eÅ <sup>-5</sup> ) | $R_{ij}$ (Å) | $\lambda_1$ | $\lambda_2$ | $\lambda_3$ | $\varepsilon$ |
|------------|----------------------------|------------------------------------|--------------|-------------|-------------|-------------|---------------|
| CL(1)-C(1) | 1.097(4)                   | 1.222(7)                           | 1.7777       | -5.56       | -5.49       | 12.27       | 0.01          |
| O(1)-C(2)  | 2.346(6)                   | -23.47 (3)                         | 1.295        | -20.16      | -18.11      | 14.79       | 0.11          |
| O(1)-H(1O) | 1.90 (1)                   | -16.75(5)                          | 1.0186       | -26.45      | -26.06      | 35.76       | 0.02          |
| O(2)-C(2)  | 2.795(7)                   | -33.53 (3)                         | 1.2302       | -26.00      | -22.5       | 14.97       | 0.16          |
| O(3)-N(1)  | 2.900(7)                   | 3.25 (2)                           | 1.2311       | -24.26      | -22.71      | 50.22       | 0.07          |
| O(4)-N(1)  | 2.911(7)                   | 0.84 (2)                           | 1.2308       | -24.77      | -23.91      | 49.52       | 0.04          |
| N(1)-C(6)  | 1.739(5)                   | -7.52 (2)                          | 1.4432       | -13.73      | -10.64      | 16.84       | 0.29          |
| N(2)-C(3)  | 2.327(7)                   | -19.06 (2)                         | 1.3321       | -19.34      | -16.12      | 16.4        | 0.2           |
| N(2)-H(2A) | 2.155(9)                   | -22.16(4)                          | 1.0109       | -27.51      | -25.29      | 30.65       | 0.09          |
| N(2)-H(2B) | 2.12 (1)                   | -21.29(5)                          | 1.0111       | -26.94      | -25.16      | 30.81       | 0.07          |
| N(3)-C(3)  | 2.235(6)                   | -15.65(2)                          | 1.3581       | -17.15      | -15.61      | 17.11       | 0.1           |
| N(3)-C(7)  | 2.243(5)                   | -15.82 (2)                         | 1.3404       | -16.89      | -15.58      | 16.65       | 0.08          |
| C(1)-C(2)  | 1.734(4)                   | -11.373(9)                         | 1.5176       | -12.38      | -11.47      | 12.48       | 0.08          |
| C(1)-H(1A) | 1.789(8)                   | -15.58(2)                          | 1.0914       | -16.37      | -16.1       | 16.9        | 0.02          |
| C(1)-H(1B) | 1.788(8)                   | -15.53 (2)                         | 1.0916       | -16.71      | -16.55      | 17.73       | 0.01          |
| C(3)-C(4)  | 1.964(4)                   | -14.28(1)                          | 1.4239       | -14.36      | -12.39      | 12.48       | 0.16          |
| C(4)-C(5)  | 2.125(5)                   | -16.22(2)                          | 1.3709       | -16.07      | -12.77      | 12.61       | 0.26          |
| C(4)-H(4)  | 1.797(9)                   | -15.27(3)                          | 1.0825       | -16.91      | -16.05      | 17.7        | 0.05          |
| C(5)-C(6)  | 2.051(5)                   | -16.232(2)                         | 1.4047       | -15.84      | -13.25      | 12.86       | 0.2           |
| C(5)-H(5)  | 1.836(8)                   | -15.65(2)                          | 1.0824       | -17.53      | -16.79      | 18.67       | 0.04          |
| C(6)-C(7)  | 2.208(5)                   | -19.95(1)                          | 1.3783       | -17.43      | -14.94      | 12.42       | 0.17          |
| C(7)-H(7)  | 1.866(9)                   | -17.142(3)                         | 1.0826       | -17.93      | -17.8       | 18.59       | 0.01          |

## S-2: CSD Analysis

**Table 4:** Summary of CSD Analysis

| Pnicogen bond acceptor atom (X) | Number of entries | Mean N...X distance (Å) | Mean X-N...X angle,θ(°) |
|---------------------------------|-------------------|-------------------------|-------------------------|
| O                               | 252               | 2.952                   | 170.411                 |
| N                               | 59                | 3.011                   | 171.168                 |
| F                               | 14                | 2.920                   | 170.539                 |

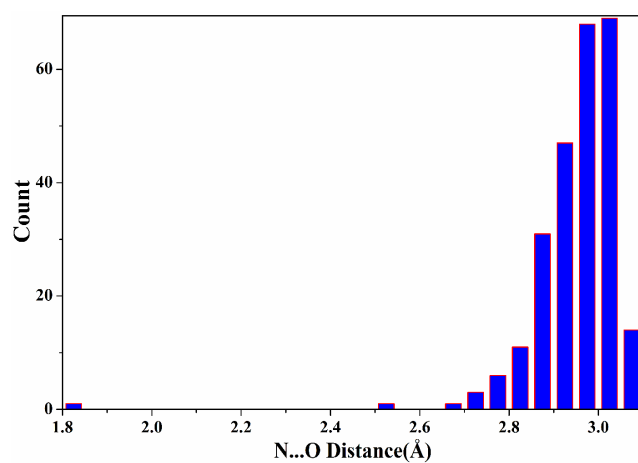

(a)

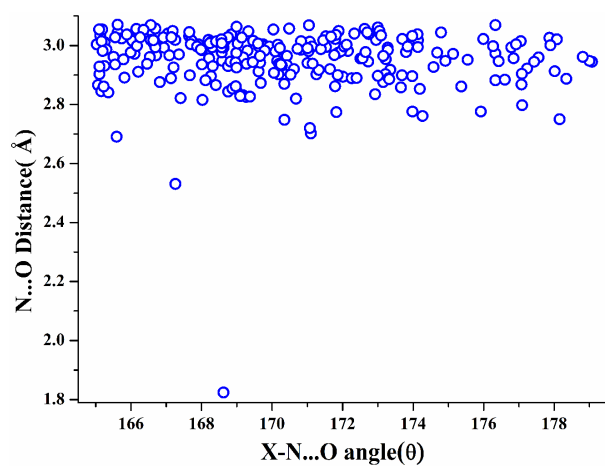

(b)

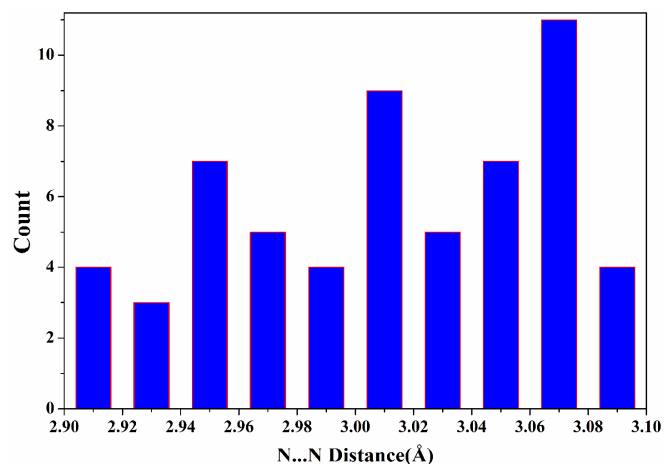

(c)

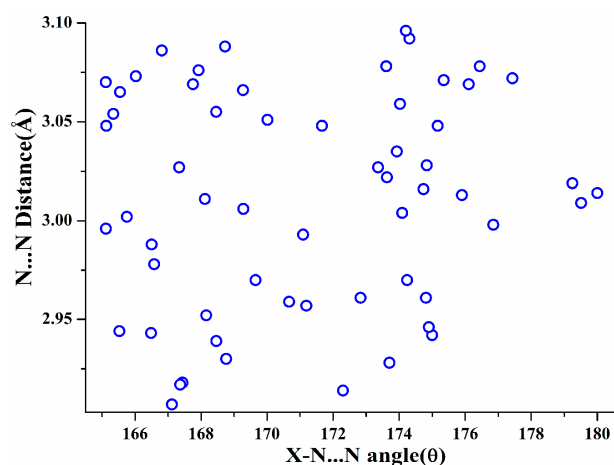

(d)

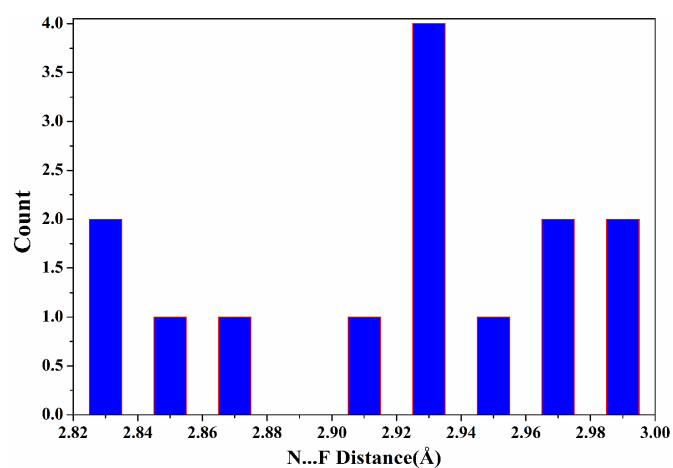

(e)

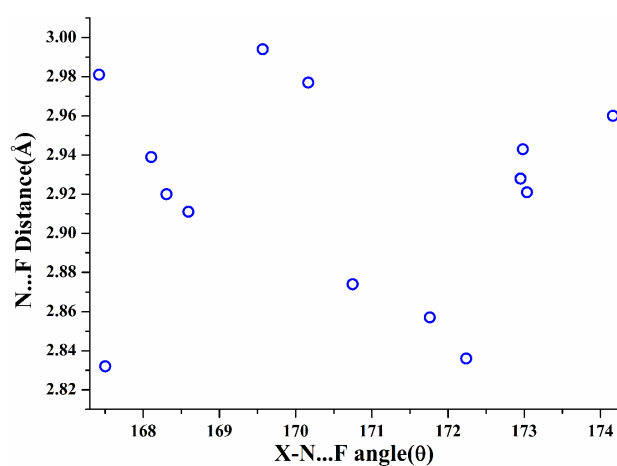

(f)

**Figure 3(a-f):** Histograms depicting various N...X distance distribution along with corresponding scatter plots showing the N...X distance vs. X-N...X angle.



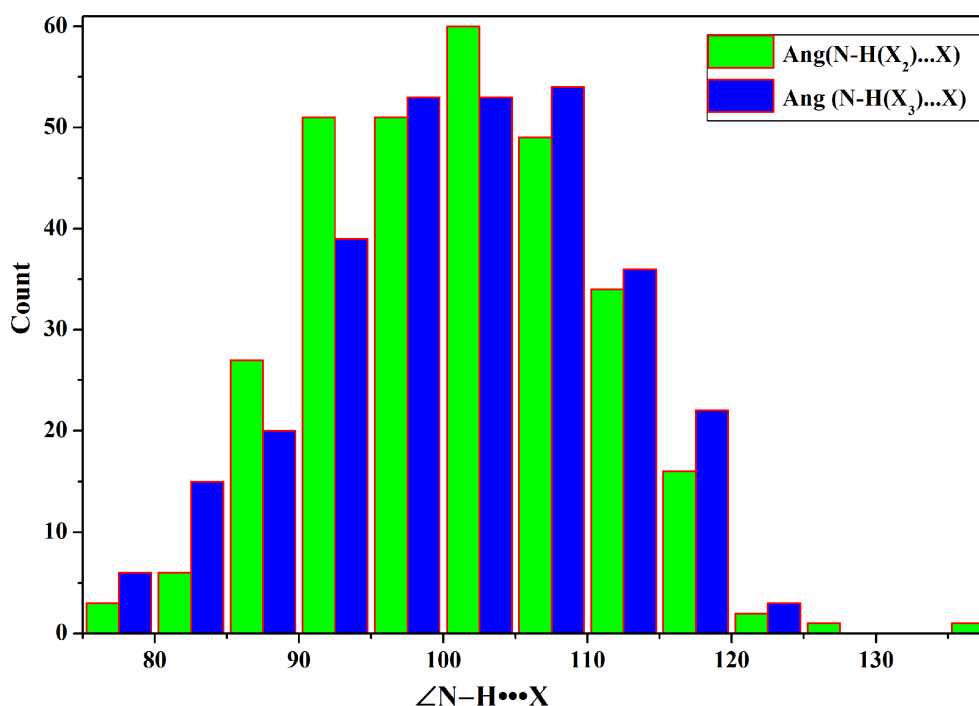

**Figure 4:** Histogram depicting the N-H...X angle distribution of the possible bifurcated H-bonding in (I)

**Table 5:** Structures found in the CSD analysis having biological relevance

| Refcode  | Compound Name (L)                                                                                                                 | Biological Activity                                                  |
|----------|-----------------------------------------------------------------------------------------------------------------------------------|----------------------------------------------------------------------|
| ATDZSA01 | 5-Acetamido-1,3,4-thiadiazole-2-sulfonamide                                                                                       | drug used for treatment of glaucoma and epilepsy and also a diuretic |
| BIXMIF   | Sulfamic acid 2-bromo-4-...4-cyanophenyl(1,2,4-triazol-4-yl)amino)methyl)phenyl ester ethyl acetate solvate                       | sulfatase inhibitor (DASI) in JEG-3 cells                            |
| BOLMAR   | 5-Fluorouracil formamide solvate                                                                                                  | is an anticancer agent                                               |
| DPGUAN03 | N,N'-Diphenylguanidine                                                                                                            | cure accelerator in the rubber industry                              |
| DUPFAV   | Deamino-oxytocin heptahydrate                                                                                                     | neurohypophyseal hormonal agent                                      |
| EMIKOA   | 2-Amino-6-(1-imidazolylmethyl)-4-(3,5,5-trimethyl-2-pyrazolin-1-yl)-1,3,5-triazine                                                | potential biological activity                                        |
| EMIKUG   | 2-Amino-6-(1-benzimidazolylmethyl)-4-(3,5,5-trimethyl-2-pyrazolin-1-yl)-1,3,5-triazine hemihydrate                                | potential biological activity                                        |
| EWEKAS   | 3-Amino-5-(1-(2-fluorobenzyl)-1H-indazol-3-yl)-10-oxa-1,4,6,8-tetra-azatricyclo(7.3.1.0 <sup>2,7</sup> )trideca-2,4,6-trien-13-ol | potent sGC-stimulator                                                |
| EWUHAF01 | Hydroflumethiazide                                                                                                                | diuretic-hypertensive agent                                          |
| FEDVAM   | 3-(N'-(4-Hydroxy-3-methoxyphenyl)methylenehydrazinocarbonyl)-1H-1,2,4-triazole                                                    | potential biological activity                                        |

|                 |                                                                                                    |                                                                                                                                                                                                                     |
|-----------------|----------------------------------------------------------------------------------------------------|---------------------------------------------------------------------------------------------------------------------------------------------------------------------------------------------------------------------|
| <b>FIYTEN</b>   | 1-(3-C-(Ethyanyl)-4-C-(hydroxymethyl)-beta-D-erythro-pentofuranosyl)cytosine                       | antiHIV or anticancer activity                                                                                                                                                                                      |
| <b>GAHHOM</b>   | 2',3'-Dideoxycytidine                                                                              | agent of potential use in AIDS therapy                                                                                                                                                                              |
| <b>JABJEC</b>   | (1,2,3,4-Tetrahydro-2-naphthalenyl)methyl sulfamic acid ester                                      | anticonvulsant activity                                                                                                                                                                                             |
| <b>KECPUE</b>   | N-(Phenylamino)-2-azaspiro(4.5)decane-1,3-dione                                                    | neurotoxic activity                                                                                                                                                                                                 |
| <b>KEHZAY</b>   | 2-Amino-7-methyl-9-(beta-D-ribofuranosyl)-8(9H)-thioxopurin-6(1H)-one monohydrate                  | immune system stimulatory action                                                                                                                                                                                    |
| <b>LINFOD</b>   | 3,5-Diamino-6-(2-methylphenyl)-1,2,4-triazine hemihydrate                                          | analogue of lamotrigine an anticonvulsant drug                                                                                                                                                                      |
| <b>MAMMEU01</b> | Trichotoxin A50E acetonitrile solvate hydrate                                                      | antibiotic activity                                                                                                                                                                                                 |
| <b>MEBQE01</b>  | 5-Fluorocytosine                                                                                   | used in the treatment of fungal infections                                                                                                                                                                          |
| <b>MOPQUD</b>   | 4-(Allylamino)-2-amino-6-benzoyloxy-5-nitrosopyrimidine                                            | potential in vitro inhibitor of human DNA repair protein O <sup>6</sup> alkylguanine-DNA-transferase                                                                                                                |
| <b>MOQLUA</b>   | Elloxazinone A                                                                                     | moderate inhibition of the proliferation of human cells from gastric adenocarcinoma in vitro; strong inhibition of hepatocellular carcinoma cells; no antibacterial or antifungal activity against tested organisms |
| <b>NILSEG</b>   | Aqua-(sulfato)-tetrakis(urea)-magnesium                                                            | a new defoliating agent                                                                                                                                                                                             |
| <b>NUJDAX</b>   | 2,2'-Difluoro-2'-deoxycytosine dihydrate                                                           | antitumor activity                                                                                                                                                                                                  |
| <b>OFEWOL</b>   | Ethyl N-(2-amino-6-benzoyloxy-5-nitrosopyrimidin-4-yl)glycinate                                    | potential AGT inhibitor                                                                                                                                                                                             |
| <b>PACMOX</b>   | 2,4-Diamino-5,7-bis(butylamino)-8-fluoroquinazoline-6-carbonitrile                                 | tested for anticancer activity                                                                                                                                                                                      |
| <b>PIWVUN</b>   | cis-2-Amino-5-(benzoyl)-1-((4-nitrophenyl)sulfonyl)-4-phenyl-4,5-dihydro-1H-pyrrole-3-carbonitrile | Some antiproliferative effect (as a 1:2 cis:trans ratio of isomers) against two cancer cell lines, HeLa and MCF7/AZ, as models for human cervical and breast adenocarcinoma, respectively                           |
| <b>POHYER</b>   | 4,6-Di-O-acetyl-2,3-dideoxy-alpha-D-erythro-hex-2-enopyranosyl sulfamide                           | selective inhibitor of carbonic anhydrase isozyme IX                                                                                                                                                                |
| <b>QAFRRAR</b>  | 5-Cyclopropyl-2-(1-(2-fluorobenzyl)-1H-pyrazolo(4,5-b)pyridin-3-yl)-4-pyrimidinamine               | inhibits maximum constriction of phenylephrine-treated precontracted rabbit aortic rings                                                                                                                            |
| <b>ROLPAJ</b>   | 1-Phenyl-4-(4-phthalimidobutyl)piperazine-1,4-dioxide dihydroperoxide hydrate                      | anxiolytic activity                                                                                                                                                                                                 |
| <b>RUKHAG</b>   | cis-4-Amino-1-(2-hydroxymethyl-1,3-oxathiolan-5-yl)-(1H)-pyrimidin-2-one                           | antiviral agent                                                                                                                                                                                                     |
| <b>UNEZAO</b>   | 5H-Dibenz(b,f)azepine-5-carboxamide saccharin                                                      | treatment for epilepsy and trigeminal neuralgia                                                                                                                                                                     |
| <b>UNEZUI</b>   | Carbamazepine butyric acid solvate                                                                 | treatment for epilepsy and trigeminal neuralgia                                                                                                                                                                     |
| <b>VELLUF</b>   | D-N-gamma-L-Glutamyl-L-cysteine ethyl ester monohydrate                                            | anticataractogenic activity and potential drug for liver and kidney diseases                                                                                                                                        |
| <b>VINTAN</b>   | Discodermolide 1 monohydrate                                                                       | immunosuppressive and cytotoxic activity, as well as inhibiting the in vitro proliferation of cultured murine P388 leukaemia cells                                                                                  |
| <b>VINTAN01</b> | (+)-Discodermolide monohydrate                                                                     | a potent antimitotic agent, an inhibitor of multidrug-resistant cancer lines and a potential new anticancer chemotherapeutic agent                                                                                  |
| <b>VUHFIO</b>   | 2-Ethoxybenzamide 1,2-benzothiazol-3(2H)-one 1,1-dioxide                                           | ethenzamide is an analgesic drug                                                                                                                                                                                    |

|               |                                                                                      |                                                                |
|---------------|--------------------------------------------------------------------------------------|----------------------------------------------------------------|
| <b>XORRUS</b> | 8-Chloro-10-phenyl-10H-pyrimido[5,4-b][1,4]benzothiazine-2,4-diamine 5,5-dioxide     | antimalarial activity via inhibition of haemoglobin hydrolysis |
| <b>YIZDUH</b> | 5-((4-Fluorophenyl)ethynyl)-1-((2-hydroxyethoxy)methyl)-1,2,4-triazole-3-carboxamide | anti-hepatitis C virus activity                                |

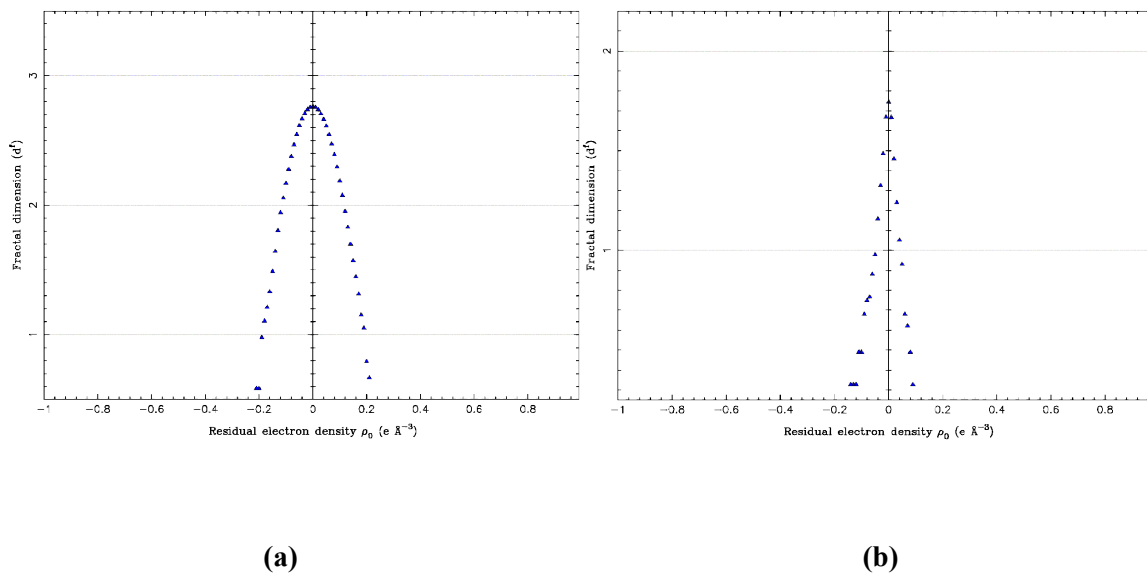

**Figure 5:** Fractal dimension plot of experimental and theoretical model; (a) and (b) (I)

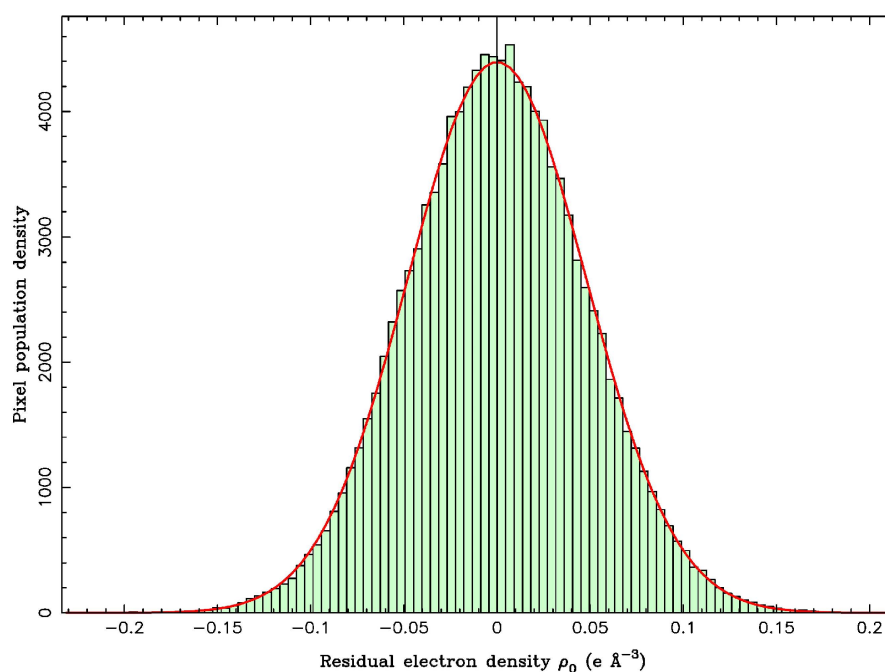

**Figure 6:** Probability distribution plot of experimental model

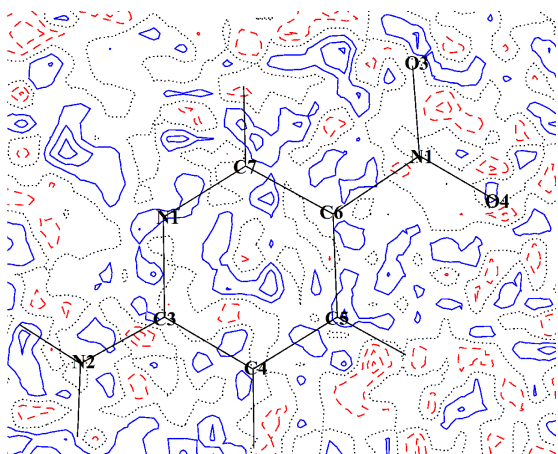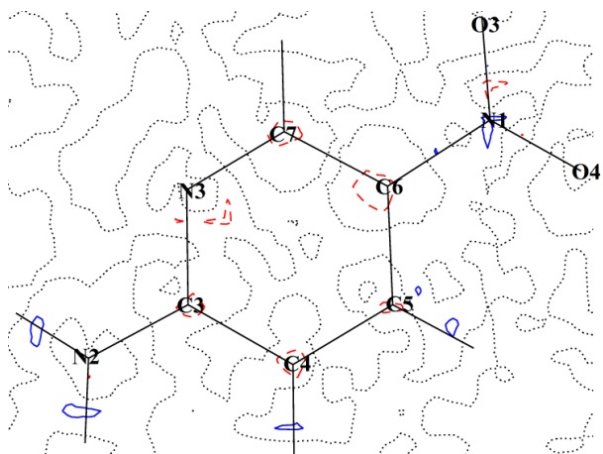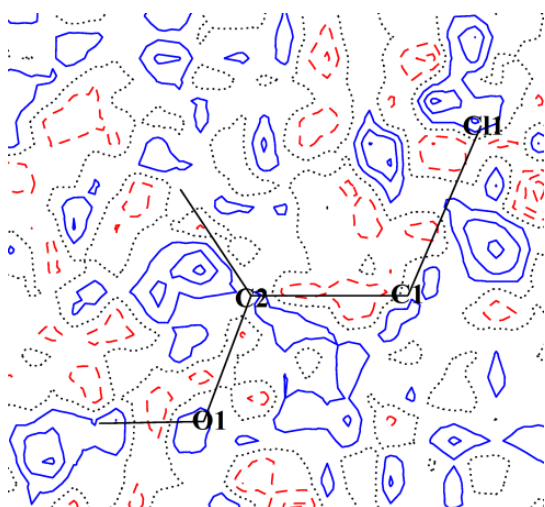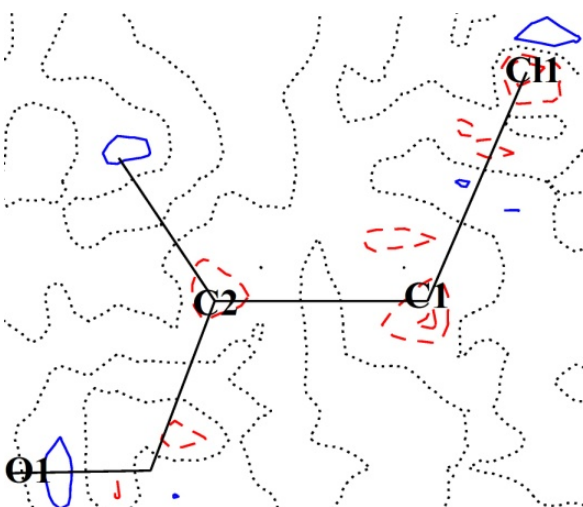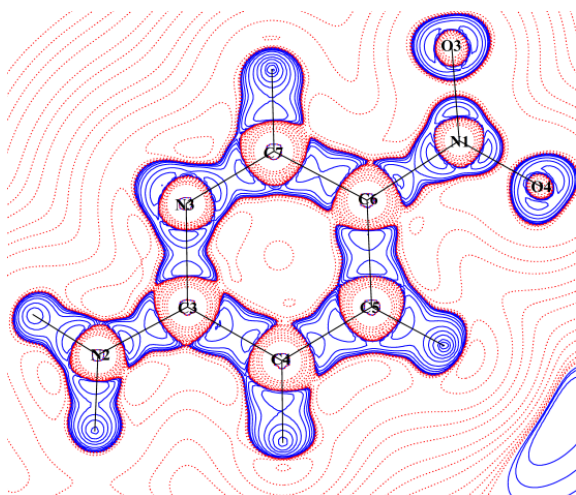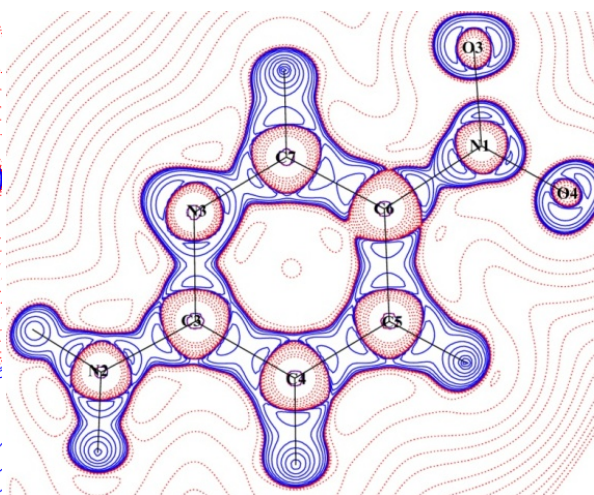

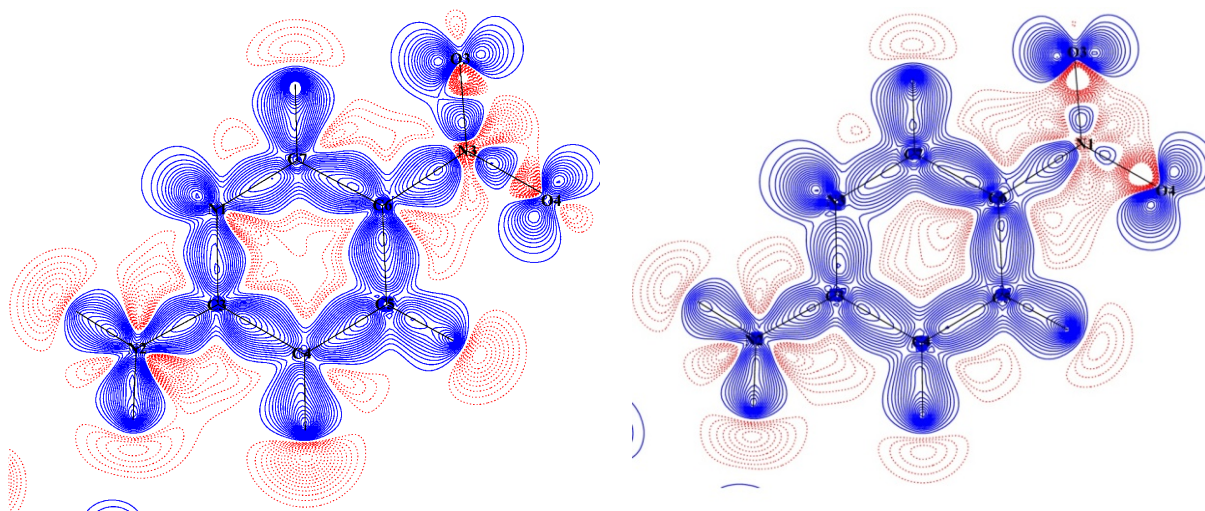

**Figure 7:** Experimental and Theoretical residual density, Laplacian and 2D deformation maps. Contours are drawn at the intervals of  $\pm 0.05 \text{ e } \text{\AA}^{-3}$  in case of residual and deformation. Laplacian is drawn in logarithmic contours.

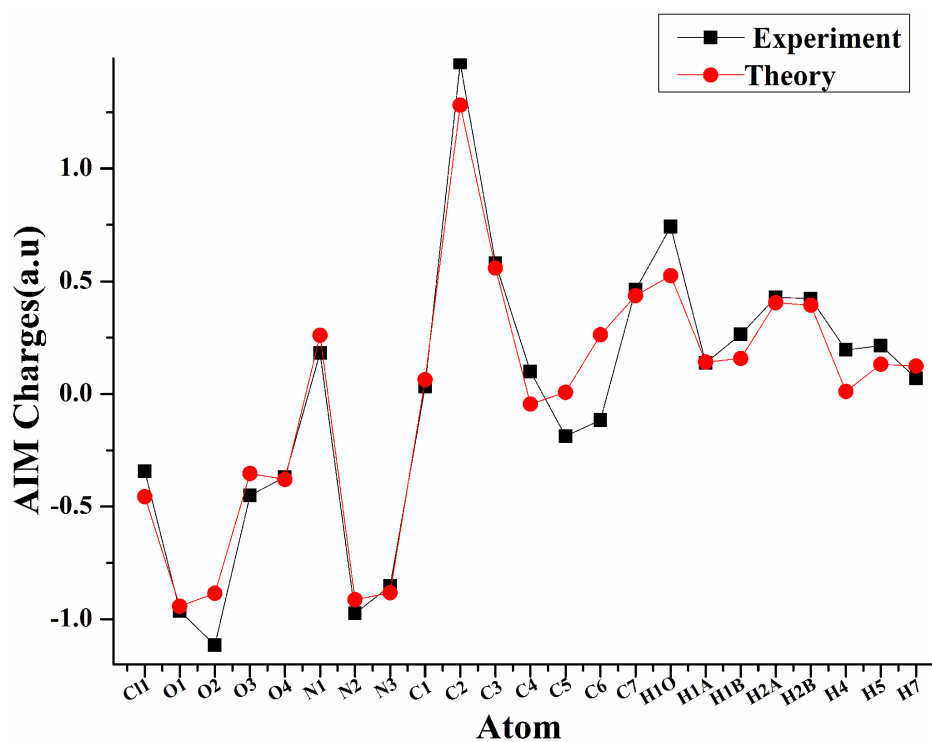

**Figure 8:** Comparison between experiment and theory AIM charges

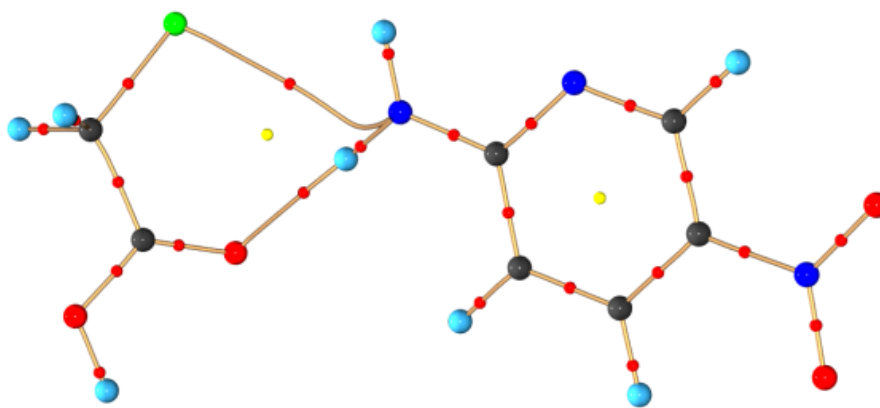

**Figure 9:** Theoretical bond paths together with bcp's in the intermolecular regions of (I)

## References

- 1 A. Bauzá, T. J. Mooibroek and A. Frontera, *Angew. Chem. Int. Ed.*, 2013, **52**, 12317-12321.
- 2 R. H. Blessing, *J. Appl. Crystallogr.*, 1997, **30**, 421-426.
- 3 G. M. Sheldrick, *Acta Crystallogr. Sect. A: Found. Crystallogr.*, 2007, **64**, 112-122.
- 4 L. J. Farrugia, *J. Appl. Crystallogr.*, 2012, **45**, 849-854.
- 5 T. Koritsanszky, P. Macchi, C. Gatti, L. Farrugia, P. Mallinson, A. Volkov and T. Richter, *A Computer Program Package for Multipole Refinement and Topological Analysis of Charge Densities and Evaluation of Intermolecular Energies from Experimental or Theoretical Structure Factors*, Version, 2007, **5**.
- 6 (a)P. Macchi and P. Coppens, *Acta Crystallogr. Sect. A: Found. Crystallogr.*, 2001, **57**, 656-662; (b)Z. Su and P. Coppens, *Acta Crystallogr. Sect. A: Found. Crystallogr.*, 1998, **54**, 646-652.
- 7 F. H. Allen and I. J. Bruno, *Acta Crystallogr. Sect. B: Struct. Sci.*, 2010, **66**, 380-386.
- 8 (a)A. O. Madsen, *J. Appl. Crystallogr.*, 2006, **39**, 757-758; (b)P. Munshi, A. O. Madsen, M. A. Spackman, S. Larsen and R. Destro, *Acta Crystallogr. Sect. A: Found. Crystallogr.*, 2008, **64**, 465-475.
- 9 N. K. Hansen and P. Coppens, *Acta Crystallographica Section A: Crystal Physics, Diffraction, Theoretical and General Crystallography*, 1978, **34**, 909-921.
- 10 A. Volkov, Y. Abramov, P. Coppens and C. Gatti, *Acta Crystallogr. Sect. A: Found. Crystallogr.*, 2000, **56**, 332-339.
- 11 (a)C. Lee, W. Yang and R. G. Parr, *Phys. Rev. B*, 1988, **37**, 785; (b)A. D. Becke, *J. Chem. Phys.*, 1996, **104**, 1040-1046.
- 12 (a)A. Schäfer, H. Horn and R. Ahlrichs, *The Journal of Chemical Physics*, 1992, **97**, 2571-2577; (b)M. F. Peintinger, D. V. Oliveira and T. Bredow, *J. Comput. Chem.*, 2013, **34**, 451-459.

- 13 R. Dovesi, V. Saunders, C. Roetti, R. Orlando, C. Zicovich-Wilson, F. Pascale, B. Civalleri, K. Doll, N. Harrison and I. Bush, *University of Torino, Torino*, 2009.
- 14 A. E. Reed, L. A. Curtiss and F. Weinhold, *Chem. Rev.*, 1988, **88**, 899-926.
- 15 M. Frisch, G. Trucks, H. B. Schlegel, G. Scuseria, M. Robb, J. Cheeseman, G. Scalmani, V. Barone, B. Mennucci and G. Petersson, *Inc., Wallingford, CT*, 2009, **200**.
- 16 J.-D. Chai and M. Head-Gordon, *Phys. Chem. Chem. Phys.*, 2008, **10**, 6615-6620.
- 17 A. Schäfer, C. Huber and R. Ahlrichs, *J.Chem.Phys.*, 1994, **100**, 5829-5835.
- 18 G. Zhurko, *Chemcraft, Version 1.7 (build 365)*.
